# Supplementary material for: The Number of Liver Galectin-3 Positive Cells Is Dually Correlated with NAFLD Severity in Children
Source: Int J Mol Sci. 2019 Jul 14;20(14):3460. doi: 10.3390/ijms20143460 (PMC6679049; doi:10.3390/ijms20143460)
Supplement: Supplementary file 1 [file ijms-20-03460-s001.pdf]

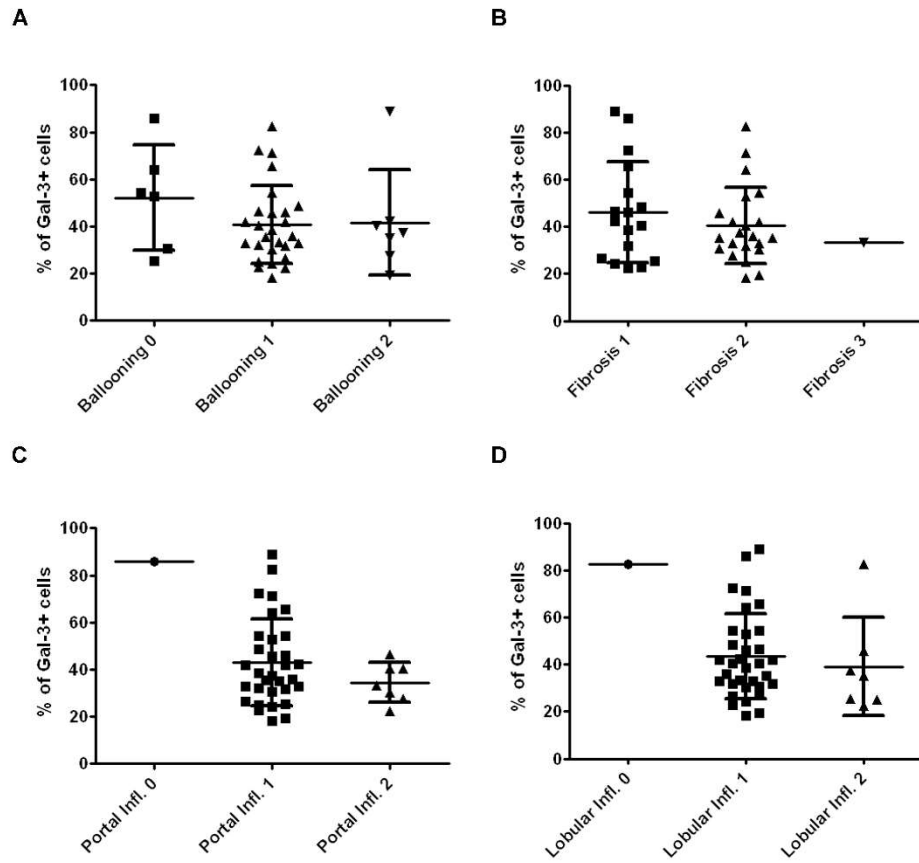

**Figure S1.** Percentage of hepatic Gal-3 + cells in children with NAFLD associated with the severity of disease. (A–D) Percentage of Gal-3 positive (Gal-3+) cells in the liver tissue from children with NAFLD correlated with degrees of ballooning (A), fibrosis (B), portal inflammation (C), and lobular inflammation (D).

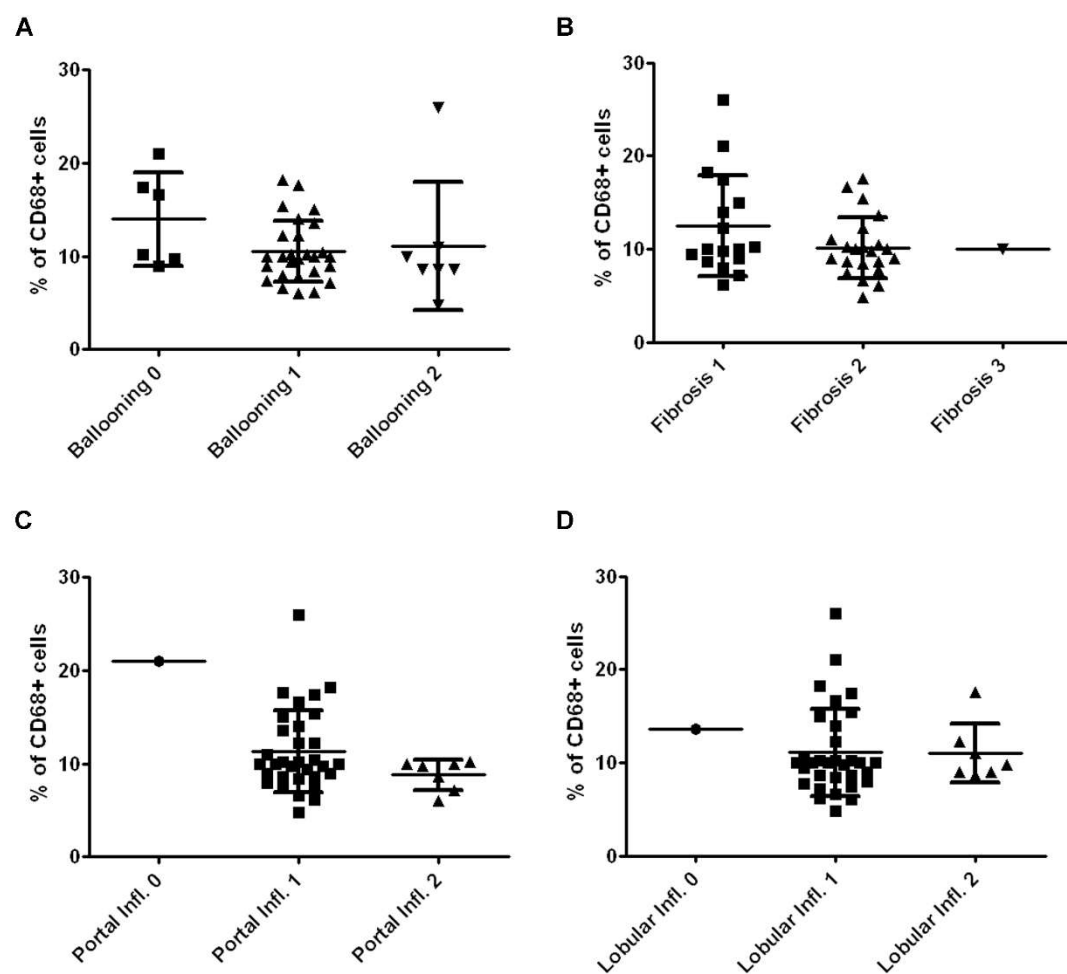

**Figure S2.** Percentage of hepatic CD68+ cells in children with NAFLD associated with the severity of disease. (A–D) Percentage of Gal-3 positive (Gal-3+) cells in the liver tissue from children with NAFLD correlated with degrees of ballooning (A), fibrosis (B), portal inflammation (C), and lobular inflammation (D).

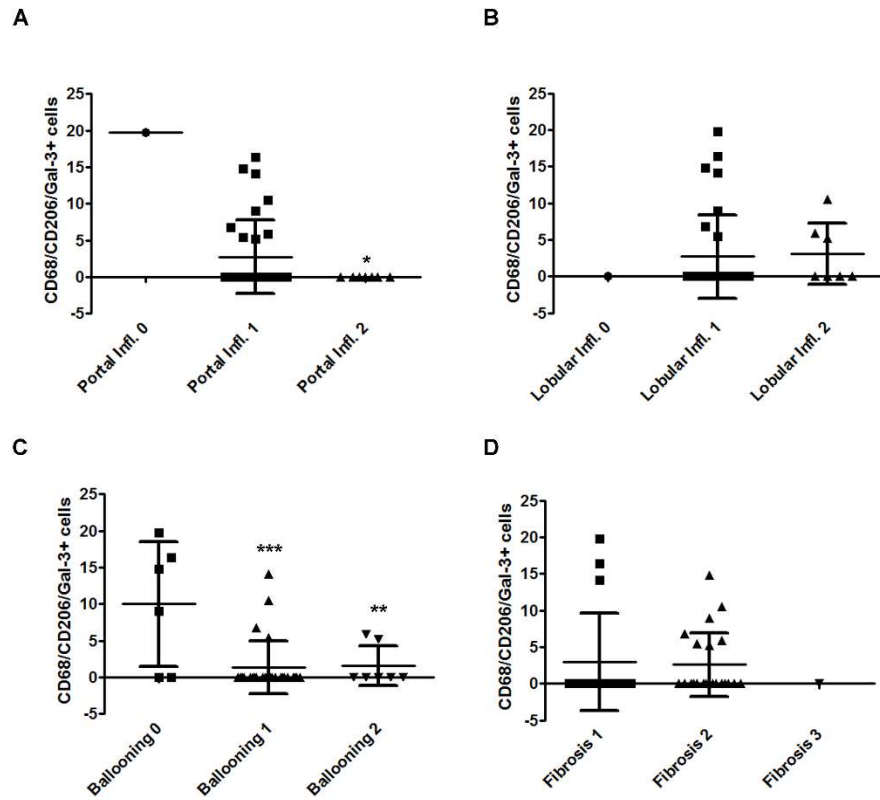

**Figure S3.** Mean number of hepatic CD68/CD206/Gal-3+ cells in children with NAFLD associated with the severity of disease. (A–D) Percentage of Gal-3 positive (Gal-3+) cells in the liver tissue from children with NAFLD correlated with degrees of portal inflammation (A), lobular inflammation (B), ballooning (C), and fibrosis (D).
